1 **An assessment of efficacy of Iodine complex (Renessans) against SARS-CoV-2 in non-**  
2 **human primates (*Rhesus macaque*)**

3 Muhammad Nawaz<sup>1</sup>, Muhammad Asad Ali<sup>1</sup>, Muhammad Adnan Ashraf<sup>1</sup>, Muhammad Zubair  
4 Shabbir<sup>1</sup>, , Muhammad Abu Bakr Shabbir<sup>1</sup>, Imran Altaf<sup>1</sup>, Sohail Raza<sup>1</sup>, Saira Rafique<sup>1</sup>, Sohail  
5 Hassan<sup>1</sup>, Nageen Sardar<sup>1</sup>, Adnan Mehmood<sup>1</sup>, Muhammad Waqar Aziz<sup>1</sup>, Sehar Fazal<sup>1</sup>,  
6 Muhammad Tahir Khan<sup>1</sup>, Muhammad Moavia Attique<sup>1</sup>, Ali Asif<sup>1</sup>, Zia Ullah<sup>1</sup>, Mubashir Iqbal<sup>1</sup>,  
7 Talha Imtiaz<sup>1</sup>, Muhammad Anwar<sup>1</sup>, Nadia Mukhtar<sup>2</sup>, Tahir Yaqub<sup>1</sup>

8 <sup>1</sup>Institute of Microbiology, University of Veterinary and Animal Sciences, Lahore, Pakistan

9 <sup>2</sup>Institute of Public Health, Lahore, Pakistan

10 **Corresponding author**

11 Prof. Dr. Tahir Yaqub

12 Email ID: [tahiryaqub@uvas.edu.pk](mailto:tahiryaqub@uvas.edu.pk)

13

14

15

16

17

18

19

20

21

22

23

24

25

26

27

## ABSTRACT

28    Renessans is an iodine complex which has proven *in vitro* antiviral activity including Anti-  
29    SARS-CoV-2 activity. The present study was designed to determine its efficacy against SARS-  
30    CoV-2 in monkeys (*Rhesus macaque*). A total of 14 monkeys were divided into four groups:  
31    A) Prophylactic group (n=03), (B) Treatment group (n=03), (C) infection control group (n=04)  
32    and (D) negative control group (n=04) and were housed in BSL-3 Animal facility while group  
33    D was housed at another animal house. Group A was administered with Renessans @ 2.85  
34    mg/7 kg from 5 days prior to the infection to 08 days post infections (DPI). Group B was  
35    administered with Renessans from 03-08 DPI @ 2.85 mg/7 kg. Group C was administered with  
36    WIF only. The infection @  $2 \times 10^6$  TCID of SARS-CoV-2 was given to all group monkeys  
37    through intranasal and oral route under anesthesia. Nasal swab samples (at different times) and  
38    fecal matter on daily basis were collected for the detection of SARS-CoV-2 through real-time  
39    quantitative PCR. Three monkeys (one from each of group A, B and C) were euthanized at 07  
40    DPI to determine the gross pathological lesions and SARS-CoV-2 detection from internal  
41    tissues. Nasal swabs from all the monkeys from group A, B and C were positive for SARS-  
42    CoV-2 at 02 and 07 DPI (Day 05 of treatment). At 14 DPI, all (100%) nasal swabs from group  
43    A were negative for SARS-CoV-2 while 50% and 100% were positive from group B and C,  
44    respectively. At 21 DPI, monkeys from group B were negative and all in group C were still  
45    positive for SARS-CoV-2. Similarly, fecal matter of monkeys in group A and B was returned  
46    negative in significantly lesser time as compared to monkeys from infection control group.  
47    Based on these research findings it is concluded that the Renessans has *in-vivo* SARS-CoV-2  
48    activity and may result in early clearance of SARS-CoV-2. Therefore, a clinical trial of the  
49    drug in COVID-19 patients may reveal its anti-COVID-19 potential.

50    **Keywords:** Iodine complex, Renessans, COVID-19, SARS-CoV-2, Rhesus macaque

51

52

53

54

55

56

## 57 **Introduction:**

58 Severe acute respiratory syndrome-related coronavirus-2 (SARS-CoV-2) was first time  
59 reported as the etiologic agent of coronavirus disease 2019 (COVID-19) in December 2019 at  
60 a wholesale seafood market in Wuhan, Hubei province, China (Lake, 2020; WHO, 2020).  
61 According to the World Health Organization (WHO) that more than 5.3 million confirmed  
62 cases and around 340,000 fatalities have been reported all over the world since its first report  
63 (WHO, 2020).

64 SARS-CoV-2 belongs to the Coronaviridae family and *Nidovirales* order. Coronaviruses are  
65 divided into alpha ( $\alpha$ ), beta ( $\beta$ ), gamma ( $\gamma$ ) and delta ( $\delta$ ) groups. This virus is from  $\beta$ -  
66 coronaviruses (Muniyappa and Gubbi, 2020; Yi et al, 2020; Ye et al., 2020). SARS-CoV-2 is  
67 a single stranded non-segmented positive sense RNA with a size of 30 kb. The genome contains  
68 sequences for replicases, papain like proteases, endoribonuclease, and spike proteins. It is  
69 important to note that spike proteins of SARS-CoV-2 are not alike from those of SARS-CoV  
70 (Tang et al., 2020; Hoffmann et al., 2020). SARS-CoV-2 is round in shape and has an envelope.  
71 Spike proteins (S1 and S2) and glycoproteins are present on its envelope. These spike proteins  
72 bind with Angiotensin-Converting Enzyme-2 (ACE-2) receptors of host cells and helps the  
73 virus to enter the cell by endocytosis. While, the membrane protein (M) of envelop determines  
74 the virus shape (Tang et al., 2020).

75 SARS-CoV-2 can spread from one human to another human through coughing and sneezing.  
76 Predilection site of the virus is lung's alveolar epithelial type 2 (AT2) cells. Several studies  
77 reported that the spike proteins of SARS-CoV-2 bind to ACE-2 receptors present on AT2 cells  
78 (Wang et al., 2020; Li et al., 2019). It has been reported that ACE-2 receptors also present on  
79 tubular epithelium of kidney, pancreas, heart, and endothelial cells (Diao et al., 2020; Liu et  
80 al., 2020; Zheng et al., 2020). Upon entering into the host cell, the virus releases its positive  
81 sense RNA that dictates host cell machinery and produce new virions (Sigrist et al., 2020).

82 SARS-CoV-2 infection can be asymptomatic and in most cases may cause mild to severe  
83 complications (Cao, 2020). Given the prevalence of asymptomatic individuals and limited  
84 availability of molecular testing in different parts of world, it is believed that true number of  
85 infections may be several fold higher than the estimates of WHO (Cheng et al., 2020).

86 Noteworthy, therapeutic options for SARS-CoV-2 have not been developed so far and hence  
87 only supportive therapy is provided to the patients (Raza et al., 2020). Therefore, present study  
88 was designed to develop a treatment for SARS-CoV-2. This study was based on our previous

89 *in vitro* study (under review) findings in which Renessans (antiviral drug) showed promising  
90 results. In current study, we determine its *in vivo* efficacy against SARS-CoV-2 in monkeys  
91 (*Rhesus macaque*). A total of 14 monkeys were divided into 4 groups and SARS-CoV-2  
92 infection was given to group A, B and C. Pre and post infection nasal as well as fecal sampling  
93 was performed for the detection of SARS-CoV-2 by real-time quantitative PCR. Furthermore,  
94 one monkey from each group A, B and C were euthanized for determining the gross  
95 pathological lesions as well as SARS-CoV-2 from different tissues samples. Present study  
96 findings did reveal that Renessans have antiviral activity and helps in early clearance of SARS-  
97 CoV-2. We believe that current study findings will provide a baseline for clinical trial against  
98 SARS-CoV-2 infection and hence helps in the development of therapeutic option for SARS-  
99 CoV-2 infection.

## 100 **Materials and Methods:**

### 101 **Experimental Design:**

102 A total of 14 monkeys (*Rhesus macaque*) were obtained from wildlife department of Pakistan  
103 to determine the *in vivo* efficacy of antiviral drug (Renessans) against SARS-CoV-2. Monkeys  
104 were weighted and divided into four groups: (A) Prophylactic group (n=03), (B) Treatment  
105 group (n=03), (C) infection control group (n=04) and (D) negative control group (n=04). These  
106 non-human primates were housed in Animal Biosafety Laboratory-3 (ABSL-3) of Institute of  
107 Microbiology, University of Veterinary and Animal Sciences (UVAS) Lahore, Pakistan for  
108 one month under standard conditions of ambient temperature ( $22 \pm 2$  °C). Food and water was  
109 provided to monkeys *ad libitum* throughout the experiment.

### 110 **Infection:**

111 Before starting the experiment, approval was taken from Institutional Biosafety committee  
112 (IBC) of UVAS, Lahore, Pakistan. Furthermore, experiment was performed according to the  
113 ethical guideline of UVAS, Lahore, Pakistan.

114 The antiviral drug (Renessans) was administered @ 2.85 mg/7 kg at the date 22 August 2020  
115 to group A from 5 days prior to the infection to 08 days post infection (DPI). Group B was  
116 administered with Renessans after the onset of clinical signs and symptoms from 03-08 DPI @  
117 2.85 mg/7 kg. Group C was administered with WIF only. SARS-CoV-2 (GenBank accession  
118 number MW031802) infection @  $2 \times 10^6$  TCID was given to group A, B and C through  
119 intranasal and oral route under anesthesia (mixture of ketamine and xylaz) at the date 26 August

120 2020. Additionally, body temperature of group A, B and C monkeys was also monitored on  
121 daily basis throughout the experiment after the onset of clinical signs and symptoms.

### 122 **Fecal and Nasal swab Sampling:**

123 Fecal and nasal swab sampling was performed to determine the shedding of SARS-CoV-2  
124 through these routes. All monkeys of group A, B and C were anesthetized for nasal sampling.  
125 We did nasal sampling five times during the whole experiment; firstly one day before the  
126 infection and then at 2 DPI, 7 DPI, 14 DPI and 21 DPI from all monkeys of group A, B and C.  
127 However, we started fecal sampling on daily basis from day 0 (infection date 26-08-2020) to  
128 16-09-2020 (experiment ending date). For better understanding, experimental plan or design is  
129 given in Figure 1.

### 130 **SARS-CoV-2 detection from tissues by real time quantitative PCR:**

131 A total of 3 monkeys (one from each group A, B and C) were euthanized for the determination  
132 of gross pathological lesions and SARS-CoV-2 from different tissues by real-time quantitative  
133 PCR. These monkeys were euthanized by giving the intra-cardiac injection of potassium  
134 chloride (Kcl) @ 10 mL. Gross pathological lesions were noted upon postmortem and tissue  
135 samples were taken and stored at -80 °C till further use.

## 136 **RESULTS:**

### 137 **1. SARS-CoV-2 detection from fecal samples of Monkeys by Real-time Quantitative PCR:**

138 Fecal samples were collected from A, B and C group monkeys at different times for the  
139 detection of SARS-CoV-2 by real time qualitative RT PCR. At 7 DPI and 14 DPI, all group C  
140 monkeys were found positive for SARS-CoV-2 while the said virus was detected from fecal  
141 matter of A (P2) and B (T3) group monkeys (one each). Noteworthy; at 21 DPI, our A group  
142 monkey P2 found negative for SARS-CoV-2 and group B (T3) monkey still found positive for  
143 SARS-CoV-2. All monkeys of group C were still shedding the virus. We can also say that fecal  
144 matter of monkeys in prophylactic group (P2 monkey) and treatment (T3 monkey) was returned  
145 negative in significantly lesser time as compared to monkeys from infection control group  
146 (Table 1). These findings suggesting that antiviral drug (Renessans) did have *in-vivo* SARS-  
147 CoV-2 activity and may result in early clearance of SARS-CoV-2.

148

149 **2. SARS-CoV-2 detection from nasal swab samples of Monkeys by Real-time Quantitative**  
150 **PCR:**

151 Nasal swabs were collected from A, B and C group at different times for the detection of SARS-  
152 CoV-2 by real time qualitative RT PCR. Pre-infection nasal swab sampling was also formed to  
153 detect the SARS-CoV-2 by real-time quantitative PCR from all the monkeys of group A, B and  
154 C and we found that all monkeys of these three groups were negative for SARS-CoV-2.  
155 However; after the 48 hours of infection, all the monkeys from group A, B and C were found  
156 positive for SARS-CoV-2 at 02 and 07 DPI. Interestingly, all (100%) nasal swabs from group  
157 A and B were negative for SARS-CoV-2 at 14 and 21 DPI. However, monkeys of C group  
158 were still found positive for SARS-CoV-2 at 14 and 21 DPI. Based on these findings we can  
159 say that Renessans (antiviral drug) did have positive effect and helps in the early recovery of  
160 group A and B monkeys from SARS-CoV-2. Detailed results are given in Table 2.

161 **3. SARS-CoV-2 detection from different tissues of group A, B and C monkeys by Real-**  
162 **time Quantitative PCR**

163 To determine the gross pathological lesions during the SARS-CoV-2 infection, one monkey  
164 (3C) from group C was euthanized at 02 DPI while three monkeys (one from each of group A,  
165 B and C) were euthanized at 07 DPI. Gross pathological lesions were noted and SARS-CoV-2  
166 detection from different tissues was performed by real-time quantitative PCR. Upon real-time  
167 PCR, SARS-CoV-2 was detected from internal tissue i.e intestine, lung, heart and spleen. At  
168 07 DPI, lung, trachea and heart tissues of monkeys in the infection control group (group C)  
169 were positive for SARS-CoV-2 while lung, trachea, heart tissues of monkeys from group A  
170 and B were negative. These findings also suggested that the antiviral drug Renessans did have  
171 positive effect in SARS-CoV-2 infection. Detailed results are given in table 3.

172 **Discussion:**

173 Present study was designed to determine the *in-vivo* efficacy of Renessans (antiviral drug) in  
174 non-human primates (*Rhesus macaque*) against SARS-CoV-2. We observed that Renessans  
175 antiviral drug showed promising results against SARS-CoV-2 in *Rhesus macaque*. We start  
176 collecting the fecal samples at 0 day of infection (SARS-CoV-2) on daily basis till the end of  
177 *in-vivo* experiment. Real-time quantitative PCR was used to detect SARS-CoV-2 and it was  
178 observed that at 7 DPI and 14 DPI, only one monkey in each group A (P2) and B (T3) were  
179 positive for SARS-CoV-2 while all monkeys of group C positive for said virus. At 21 DPI,  
180 group A monkey P2 found negative for SARS-CoV-2 while group B monkey T3 still found

181 positive for SARS-CoV-2. However, monkeys from group C were still shedding the virus.  
182 Similarly, pre-infection nasal swab sampling was performed from all group monkey i.e. A, B  
183 and C for SARS-CoV-2 infection by real time quantitative PCR and it was observed that  
184 monkeys of these groups were negative. However; at 02 DPI and 07 DPI, all the monkeys from  
185 group A, B and C were found positive for SARS-CoV-2. Noteworthy; at 14 DPI and 21 DPI,  
186 nasal swab samples of prophylactic (A) and treatment (B) group were found negative for  
187 SARS-CoV-2. However, monkeys of C group were still found positive for SARS-CoV-2 at 14  
188 and 21 DPI. This might be due to positive effect of Renessans against SARS-CoV-2 and it may  
189 also possible that prophylactic (A) and treatment (B) group were recovered early because of  
190 SARS-CoV-2 specific immune response. Present study findings are in line with recently  
191 published study findings (Kuri et al., 2020; Mathew et al., 2020).

192 The monkeys of group A, B and C were infected @  $2 \times 10^6$  TCID of SARS-CoV-2 through  
193 intranasal and oral route under anesthesia. Nasopharyngeal swab sampling is a standard method  
194 to detect SARS-CoV-2 (WHO, 2020), and hence pre and post infection nasal swab sampling  
195 of group A, B and C was performed and SARS-CoV-2 was detected by real time quantitative  
196 PCR. At 2 and 7 DPI, all the monkeys from group A, B and C were found positive for SARS-  
197 CoV-2; however, it is interesting to note that all (100%) nasal swabs from group A and B were  
198 negative for SARS-CoV-2 at 14 and 21 DPI. Understandably, monkeys of C group were still  
199 found positive for SARS-CoV-2 at 14 and 21 DPI. Based on these findings we can say that  
200 Renessans (antiviral drug) did have positive effect and helps in the early recovery of group A  
201 and B monkeys from SARS-CoV-2.

202 Gross pathological lesions as well as presence of SARS-CoV-2 virus was determined by  
203 euthanizing the one monkey in each group A, B and C at 07 DPI. Upon real time quantitative  
204 PCR of postmortem biopsy samples, SARS-CoV-2 virus was detected from lungs, spleen,  
205 intestine and heart. This suggest that SARS-CoV-2 can infect other organs apart from lungs.  
206 Similar findings were also observed in another study where they detected SARS-CoV-2 by RT-  
207 PCR in heart and liver (Tian et al., 2019). However, it is important to note that gross  
208 pathological lesion were less severe in group A and B than the group C, suggesting that  
209 Renessans did have antiviral activity and helps in the early recovery of SARS-CoV-2 infected  
210 monkeys.

211

212



213 **Conclusion:**

214 In the light of current study findings, it is concluded that the Renessans has an *in-vivo* SARS-  
215 CoV-2 activity and may result in early clearance of SARS-CoV-2. Therefore, we believe that  
216 current study may provide a basis for clinical trial of the drug in SARS-CoV-2 patients and  
217 reveal its anti-SARS-CoV-2 potential.

218 **Reference:**

- 219 **1.** Kuri-Cervantes L, Pampena MB, Meng W, Rosenfeld AM, Ittner CAG, Weisman AR, et al.  
220 Immunologic perturbations in severe COVID-19/SARS-CoV-2 infection. bioRxiv.  
221 2020:2020.05.18.101717. pmid: 32511394.
- 222 **2.** Mathew D, Giles JR, Baxter AE, Greenplate AR, Wu JE, Alanio C, et al. Deep immune  
223 profiling of COVID-19 patients reveals patient heterogeneity and distinct immunotypes with  
224 implications for therapeutic interventions. bioRxiv. 2020:2020.05.20.106401. pmid:32511371
- 225 **3.** World Health Organization. 19 March 2020. Laboratory testing for 2019 novel coronavirus  
226 (2019-nCoV) in suspected human cases. Interim guidance. WHO/COVID-  
227 19/laboratory/2020.5. World Health Organization, Geneva, Switzerland.  
228 [https://www.who.int/publications-detail/laboratory](https://www.who.int/publications-detail/laboratory-testing-for-2019-novel-coronavirus-in-suspected-human-cases-20200117)  
229 [-testing-for-2019-novel-coronavirus-in-](https://www.who.int/publications-detail/laboratory-testing-for-2019-novel-coronavirus-in-suspected-human-cases-20200117)  
[suspected-human-cases -20200117](https://www.who.int/publications-detail/laboratory-testing-for-2019-novel-coronavirus-in-suspected-human-cases-20200117). Accessed 27 March 2020.
- 230 **4.** Tian S, Xiong Y, Liu H, Niu L, Guo J, Liao M, et al. Pathological study of the 2019 novel  
231 coronavirus disease (COVID-19) through postmortem core biopsies. Mod Pathol. 2020;  
232 33:1007–14.
- 233 **5.** Lake, M.A., 2020. What we know so far: COVID-19 current clinical knowledge and  
234 research. Clin. Med. 20, 124.
- 235 **6.** World Health Organization. WHO coronavirus disease (COVID-19) dashboard. Accessed  
236 at <https://covid19.who.int> on 4 May 2020.
- 237 **7.** Muniyappa R., Gubbi S. COVID-19 pandemic, coronaviruses, and diabetes mellitus. Am J  
238 Physiol Endocrinol Metab. 2020; 318(5):E736–E741.
- 239 **8.** Yi Y., Lagniton P.N.P., Ye S., Li E., Xu R.H. COVID-19: what has been learned and to be  
240 learned about the novel coronavirus disease. Int. J. Biol. Sci. 2020; 16:1753–1766.
- 241 **9.** Ye Z.W., Yuan S., Yuen K.S., Fung S.Y., Chan C.P., Jin D.Y. Zoonotic origins of human  
242 coronaviruses. Int. J. Biol. Sci. 2020; 16: 1686–1697.
- 243 **10.** Tang T., Bidon M., Jaimes J.A., Whittaker G.R., Daniel S. Coronavirus membrane fusion  
244 mechanism offers as a potential target for antiviral development. Antivir. Res. 2020; 104792.



- 245 **11.** Hoffmann M., Kleine-Weber H., Schroeder S., Kruger N., Herrler T., Erichsen S.,  
246 Schiergens T.S., Herrler G., Wu N.H., Nitsche A., Muller M.A., Drosten C., Pohlmann S.  
247 SARS- CoV-2 cell entry depends on ACE2 and TMPRSS2 and is blocked by a clinically  
248 proven protease inhibitor. *Cell*. 2020; 181 (2):271–280.
- 249 **12.** Wang Q., Zhang Y., Wu L., Niu S., Song C., Zhang Z., Lu G., Qiao C., Hu Y., Yuen  
250 K.Y., Wang Q., Zhou H., Yan J., Qi J. Structural and functional basis of SARS-CoV-2 entry  
251 by using human ACE2. *Cell*. 2020; 181 (4):894–904.
- 252 **13.** Li Z., Tomlinson A.C., Wong A.H., Zhou D., Desforges M., Talbot P.J., Benlekbir S.,  
253 Rubinstein J.L., Rini J.M. The human coronavirus HCoV-229E S-protein structure and  
254 receptor binding. *eLife*. 2019; 8.
- 255 **14.** B. Diao, C. Wang, R. Wang, Z. Feng, Y. Tan, H. Wang, C. Wang, L. Liu, Y. Liu, Y. Liu,  
256 G. Wang, Z. Yuan, L. Ren, Y. Wu, Y. Chen, Human Kidney is a Target for Novel Severe  
257 Acute Respiratory Syndrome Coronavirus 2 (SARS-CoV-2) Infection, (medRxiv), (2020)  
258 2020.2003.2004.20031120.
- 259 **15.** Liu F., Long X., Zou W., Fang M., Wu W., Li W., Zhang B., Zhang W., Chen X., Zhang  
260 Z. 2020. Highly ACE2 Expression in Pancreas May Cause Pancreas Damage After SARS-  
261 CoV-2 Infection. (medRxiv) (2020.2002.2028.20029181).
- 262 **16.** Zheng Y.Y., Ma Y.T., Zhang J.Y., Xie X. COVID-19 and the cardiovascular system,  
263 nature reviews. *Cardiology*. 2020; 17(5):259–260.
- 264 **17.** Sigrist C.J., Bridge A., Le Mercier P. A potential role for integrins in host cell entry by  
265 SARS-CoV-2. *Antivir. Res*. 2020; 177: 104759.
- 266 **18.** Cao, W., 2020. Clinical features and laboratory inspection of novel coronavirus  
267 pneumonia (COVID-19) in Xiangyang, Hubei. medRxiv (In press).
- 268 **19.** Cheng, Matthew P., Cedric P. Yansouni, Nicole E. Basta, Michaël Desjardins, Sanjat  
269 Kanjilal, Katryn Paquette, Chelsea Caya et al. "Serodiagnostics for Severe Acute Respiratory  
270 Syndrome–Related Coronavirus-2: A Narrative Review." *Annals of Internal Medicine* (2020).
- 271 **20.** Raza, Hassan, Braira Wahid, Ghazala Rubi, and Adil Gulzar. "Molecular epidemiology of  
272 SARS-CoV-2 in Faisalabad, Pakistan: A real-world clinical experience." *Infection, Genetics*  
273 *and Evolution* (2020): 104374.

274

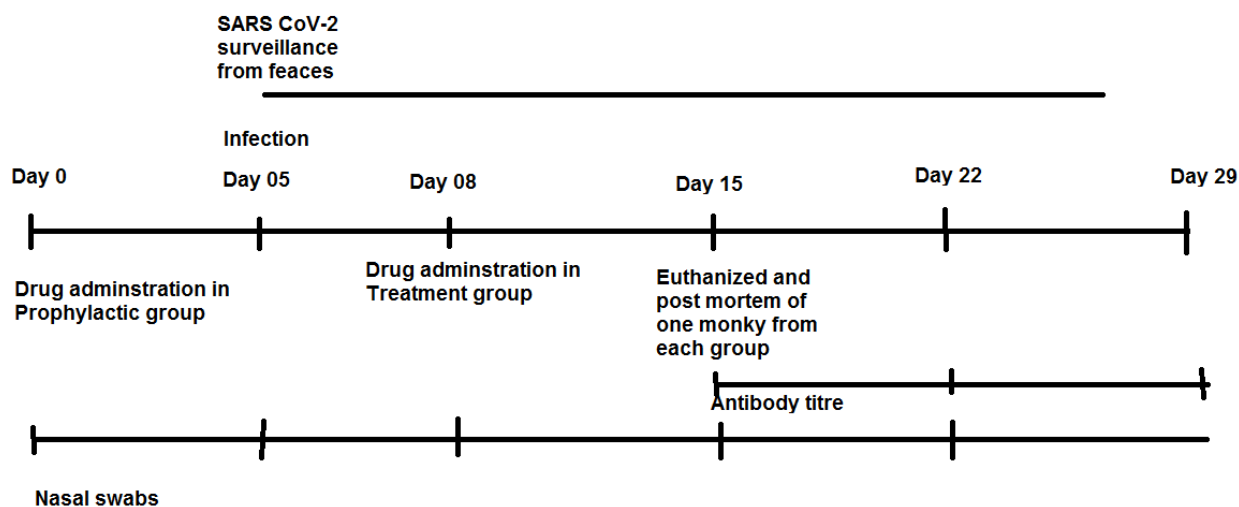

275 **Figure 1:** Detailed experimental plan for determining the *in vivo* efficacy of antiviral drug  
276 (Renessans) against SARS-CoV-2.

277

278

279

280

281

282

283

284

285

286

287

288

289

290

291 **Table 1: Detection of SARS-CoV-2 from fecal samples of Monkeys by Real-time**  
 292 **Quantitative PCR**

| Group                       | I.D | Detection of SARS-CoV-2 from fecal matter |   |   |   |   |           |    |   |    |    |    |    |           |    |    |    |    |    |    |           |
|-----------------------------|-----|-------------------------------------------|---|---|---|---|-----------|----|---|----|----|----|----|-----------|----|----|----|----|----|----|-----------|
|                             |     | Day 0                                     | 2 | 4 | 5 | 6 | 7         | 8  | 9 | 10 | 11 | 12 | 13 | 14        | 15 | 16 | 17 | 18 | 19 | 20 | 21        |
|                             |     | Infection                                 |   |   |   |   | 07<br>DPI |    |   |    |    |    |    | 14<br>DPI |    |    |    |    |    |    | 21<br>DPI |
| Prophylactic group (A)      | P1  | ND                                        | N | N | N | N | N         | N  | N | N  | N  | N  | N  | N         | N  | N  | N  | N  | N  | N  | N         |
|                             | P2  | ND                                        | N | N | N | 3 | 31        | 28 | 2 | 2  | 28 | 28 | 3  | 30.       | 2  | 2  | 2  | 3  | 2  | N  | N         |
|                             | P3  | ND                                        | N | N | N | N | N         | N  | N | N  | N  | N  | N  | N         | N  | N  | N  | N  | N  | N  | N         |
| Treatment group (B)         | T1  | ND                                        | N | N | N | N | N         | N  | N | N  | N  | N  | N  | N         | N  | N  | N  | N  | N  | N  | N         |
|                             | T2  | ND                                        | N | N | N | N | N         | N  | N | N  | N  | N  | N  | N         | N  | N  | N  | N  | N  | N  | N         |
|                             | T3  | ND                                        | 3 | 3 | 3 | 2 | 29.       | 29 | 2 | 2  | 28 | 30 | 3  | 30.       | 3  | 3  | 3  | 3  | 3  | 3  | 32.       |
| Infection/Control group (C) | I1  | ND                                        | N | 3 | 3 | 2 | 27.       | 26 | 2 | 2  | 34 | 32 | 3  | 27.       | 3  | 3  | 3  | 2  | 3  | 3  | 33        |
|                             | I2  | ND                                        | 2 | 3 | 3 | 2 | 25.       | N  | N | N  | N  | N  | N  | N         | N  | N  | N  | N  | N  | N  | N         |
|                             | I3  | ND                                        | N | 3 | 3 | 2 | 31.       | 31 | 2 | 3  | 30 | 33 | 3  | 30.       | 3  | 2  | 3  | 3  | 3  | 3  | 31        |

293 **NA= Not applicable; ND= Not detected; DPI= Day post infection**

294

295

296

297

298

299

300

301 **Table 2: Detection of SARS-CoV-2 from nasal swab samples of Monkeys by Real-time**  
 302 **Quantitative PCR**

| Groups                 | Monkey I.D | Detection of SARS-CoV-2 from nasal swab |                   |      |       |        |        |
|------------------------|------------|-----------------------------------------|-------------------|------|-------|--------|--------|
|                        |            | Pre-infection                           | 26/8<br>0 Day     | 2DP1 | 7DPI  | 14 DPI | 21 DPI |
| Prophylactic (A group) | P1         | ND                                      | Infection<br>date | 21   | 25.16 | ND     | ND     |
|                        | P2         | ND                                      |                   | 28   | 36    | ND     | ND     |
|                        | P3         | ND                                      |                   | 18   | 28.37 | NA     | NA     |
| Treatment (B group)    | T1         | ND                                      |                   | 18   | 25    | ND     | ND     |
|                        | T2         | ND                                      |                   | 24   | 27.42 | NA     | NA     |
|                        | T3         | ND                                      |                   | 26   | 25    | ND     | ND     |
| Infection (C group)    | I1         | ND                                      |                   | 21   | 25.2  | 33     | 32     |
|                        | I2         | ND                                      |                   | 19   | 28.7  | NA     | NA     |
|                        | I3         | ND                                      |                   | 17   | 27.27 | 26.8   | 29     |
|                        | I4         | ND                                      |                   | 24   | NA    | NA     | NA     |

303 **NA= Not applicable; ND= Not detected; DPI= Day post infection**

304 **Table 3: Detection of SARS-CoV-2 from different tissues of group A, B and C monkeys**  
 305 **by Real-time Quantitative PCR**

| Detection of SARS-CoV-2 from Tissue samples |                              |                           |                           |
|---------------------------------------------|------------------------------|---------------------------|---------------------------|
| Organs                                      | Monkey ID                    |                           |                           |
|                                             | Prophylactic (A group)<br>P3 | Treatment (B group)<br>T2 | Infection (C group)<br>I2 |
| Intestine                                   | 0                            | 0                         | 32                        |
| Lungs                                       | 0                            | 0                         | 24                        |
| Heart                                       | 0                            | 0                         | 32                        |
| Ovary                                       | 0                            | NA                        | 35.36                     |
| Trachea                                     | 0                            | 0                         | 33                        |

306 **NA= Not applicable**

307

308

309

310

311

312

313
